# Supplementary material for: Risk of Hemolytic Anemia in IBD Patients with Glucose-6-Phosphate Dehydrogenase Deficiency Treated with Mesalamine: Results of a Retrospective-Prospective and Ex Vivo Study
Source: MDPI journal article supplement (doi:10.3390/jcm12144797), 2023-07-20
Supplement: s1 [file s1]

**Table S1.** Demographics and clinical features of 453 study participants with inflammatory bowel disease (IBD) stratified according to Glucose-6-phosphate dehydrogenase status.

| <b>Variables</b>                    | <b>G6PD <sup>1</sup> normal<br/>(n=375)</b> | <b>G6PD <sup>1</sup> deficiency<br/>(n=78)</b> |
|-------------------------------------|---------------------------------------------|------------------------------------------------|
| <i>Sex, n (%)</i>                   |                                             |                                                |
| Female                              | 208 (55.5)                                  | 52 (66.7)                                      |
| Male                                | 167 (44.5)                                  | 26 (33.3)                                      |
| <i>Age (mean, years)</i>            | 52.4 ± 16.4                                 | 50.9 ± 16.6                                    |
| <i>Age distribution, n (%)</i>      |                                             |                                                |
| < 30                                | 39 (10.4)                                   | 9 (11.5)                                       |
| 30 - 39                             | 53 (14.1)                                   | 14 (17.9)                                      |
| 40 - 49                             | 62 (16.5)                                   | 11 (14.1)                                      |
| 50 - 59                             | 88 (23.5)                                   | 18 (23.1)                                      |
| 60 - 69                             | 75 (20.0)                                   | 14 (17.9)                                      |
| 70 - 79                             | 45 (12.0)                                   | 10 (12.8)                                      |
| ≥ 80                                | 13 (3.5)                                    | 2 (2.6)                                        |
| <i>Body mass index, n (%)</i>       |                                             |                                                |
| < 25 kg/m <sup>2</sup>              | 258 (68.8)                                  | 45 (57.7)                                      |
| 25 – 29 kg/m <sup>2</sup>           | 92 (24.5)                                   | 25 (32.1)                                      |
| ≥ 30 kg/m <sup>2</sup>              | 25 (6.7)                                    | 8 (10.3)                                       |
| <i>Cigarette smoke, n (%)</i>       |                                             |                                                |
| No                                  | 233 (56.8)                                  | 53 (67.9)                                      |
| Former smoker                       | 121 (32.3)                                  | 19 (24.4)                                      |
| Current smoker                      | 41 (10.9)                                   | 6 (7.7)                                        |
| <i>Treatment#, n (%)</i>            |                                             |                                                |
| Topical                             | 26 (6.9)                                    | 13 (16.6)                                      |
| Mesalamine per os                   | 247 (65.8)                                  | 47 (60.3)                                      |
| Immunomodulators                    | 61 (16.2)                                   | 20 (25.6)                                      |
| Biologic                            | 54 (14.4)                                   | 11 (14.1)                                      |
| <i>Disease duration, months (%)</i> |                                             |                                                |
| 6 – 9                               | 95 (25.3)                                   | 22 (28.2)                                      |
| 10 – 19                             | 238 (63.5)                                  | 47 (60.3)                                      |
| 20 – 29                             | 34 (9.1)                                    | 5 (6.4)                                        |
| ≥ 30                                | 8 (2.1)                                     | 4 (5.1)                                        |
| <i>IBD type, n (%)</i>              |                                             |                                                |
| Crohn's                             | 81 (21.6)                                   | 30 (38.5)                                      |
| Ulcerative colitis                  | 294 (78.4)                                  | 48 (61.5)                                      |
| <i>IBD localization (%)</i>         |                                             |                                                |
| Distal proctitis                    | 11 (2.9)                                    | 1 (1.3)                                        |
| Ulcerative left colitis             | 150 (40.0)                                  | 37 (47.4)                                      |
| Pancolitis                          | 123 (32.8)                                  | 20 (25.6)                                      |
| Ileocolic Crohn's                   | 61 (16.3)                                   | 19 (24.4)                                      |
| Colic Crohn's                       | 16 (4.3)                                    | 0 (0.0)                                        |
| Crohn's with fistulae               | 14 (3.7)                                    | 1 (1.3)                                        |

<sup>1</sup> Glucose-6-phosphate dehydrogenase; # Drugs were used in different combinations

**Table S2.** Side effects complained by patients with inflammatory bowel disease treated with oral mesalamine as monotherapy according to the G6PD Status

| Side effects         | G6PD <sup>1</sup> Normal<br>(n=101) | G6PD Deficiency<br>(n=22) |
|----------------------|-------------------------------------|---------------------------|
| Dispepsia            | 3                                   | 1                         |
| Nausea               | 2                                   | 1                         |
| Abdominal pain       | 2                                   | 1                         |
| Abdominal discomfort | 1                                   | 0                         |
| Abdominal bloating   | 1                                   | 0                         |
| Headache             | 1                                   | 0                         |
| Constipation         | 1                                   | 0                         |
| Pruritus             | 1                                   | 0                         |

<sup>1</sup> Glucose-6-phosphate dehydrogenase

**Table S3.** Markers of hemolytic anemia among 158 patients with inflammatory bowel disease according to oral mesalamine formulation, oral budesonide and glucose-6-phosphate dehydrogenase status.

| Variables<br>(normal range)             | Multimatrix           |                           | Delayed release enteric-coated tablet<br>pH dependent |                          | Controlled release capsule<br>Time reales |                          | Oral Budesonide      |                          |
|-----------------------------------------|-----------------------|---------------------------|-------------------------------------------------------|--------------------------|-------------------------------------------|--------------------------|----------------------|--------------------------|
|                                         | G6PD normal<br>(n=46) | G6PD deficiency<br>(n=10) | G6PD normal<br>(n=31)                                 | G6PD deficiency<br>(n=7) | G6PD normal<br>(n=25)                     | G6PD deficiency<br>(n=3) | G6PD normal<br>(n=7) | G6PD deficiency<br>(n=4) |
| Hemoglobin <sup>†</sup><br>(g/dL)       | 14.0 ± 1.2            | 13.2 ± 1.1                | 14.3 ± 1.6                                            | 12.2 ± 0.8 *             | 13.6 ± 0.8                                | 13.5 ± 0.4               | 14.1 ± 0.9           | 12.3 ± 1.0**             |
| Reticulocytes (0.5-2.5%)                | 1.21 ± 0.34           | 1.67 ± 0.75 *             | 1.29 ± 0.46                                           | 2.00 ± 1.13              | 1.42 ± 0.71                               | 1.10 ± 0.14              | 1.29 ± 0.59          | 1.76 ± 0.94              |
| Unconjugated bilirubin (0.20-0.70 g/dL) | 0.50 ± 0.49           | 0.53 ± 0.22               | 0.46 ± 0.22                                           | 0.37 ± 0.04              | 0.44 ± 0.10                               | 0.94 ± 0.65 *            | 0.52 ± 0.21          | 0.63 ± 0.45              |
| Serum iron (50-170 µg/dL)               | 73.7 ± 27.5           | 77.4 ± 22.4               | 89.6 ± 35.9                                           | 75.3 ± 18.9              | 97.3 ± 30.2                               | 55.0 ± 14.1              | 86.1 ± 28.0          | 72.9 ± 23.2              |
| Ferritine (8-252 µg/mL)                 | 101.2 ± 54.9          | 101.3 ± 38.8              | 106.4 ± 85.5                                          | 112.7 ± 23.7             | 122.7 ± 134.4                             | 100.1 ± 94.5             | 93.3 ± 62.1          | 100.1 ± 38.1             |
| Haptoglobin (30-200 mg/dL)              | 171.4 ± 80.6          | 197.8 ± 92.7              | 178.8 ± 55.7                                          | 147.3 ± 22.5             | 130.3 ± 54.2                              | 95.0 ± 7.0               | 139.2 ± 67.9         | 120.8 ± 28.1             |
| Lactate dehydrogenase (125-220 U/L)     | 200.6 ± 51.3          | 193.2 ± 29.6              | 123.7 ± 31.3                                          | 173.2 ± 37.8 *           | 179.0 ± 1.41                              | 213.6 ± 136.1            | 168.3 ± 24.1         | 187.5 ± 24.1             |

\* p&lt;0.05; \*\* p&lt;0.001
